# Supplementary material for: Protein and DNA Sequence Determinants of Thermophilic Adaptation
Source: PLOS journal article supplement (doi:10.1371/journal.pcbi.0030005), 2007-01-10

**Figure S4.**

Dependence of the fraction of G+C nucleotides on the optimal growth temperature for the 204 genomes from Table S1.


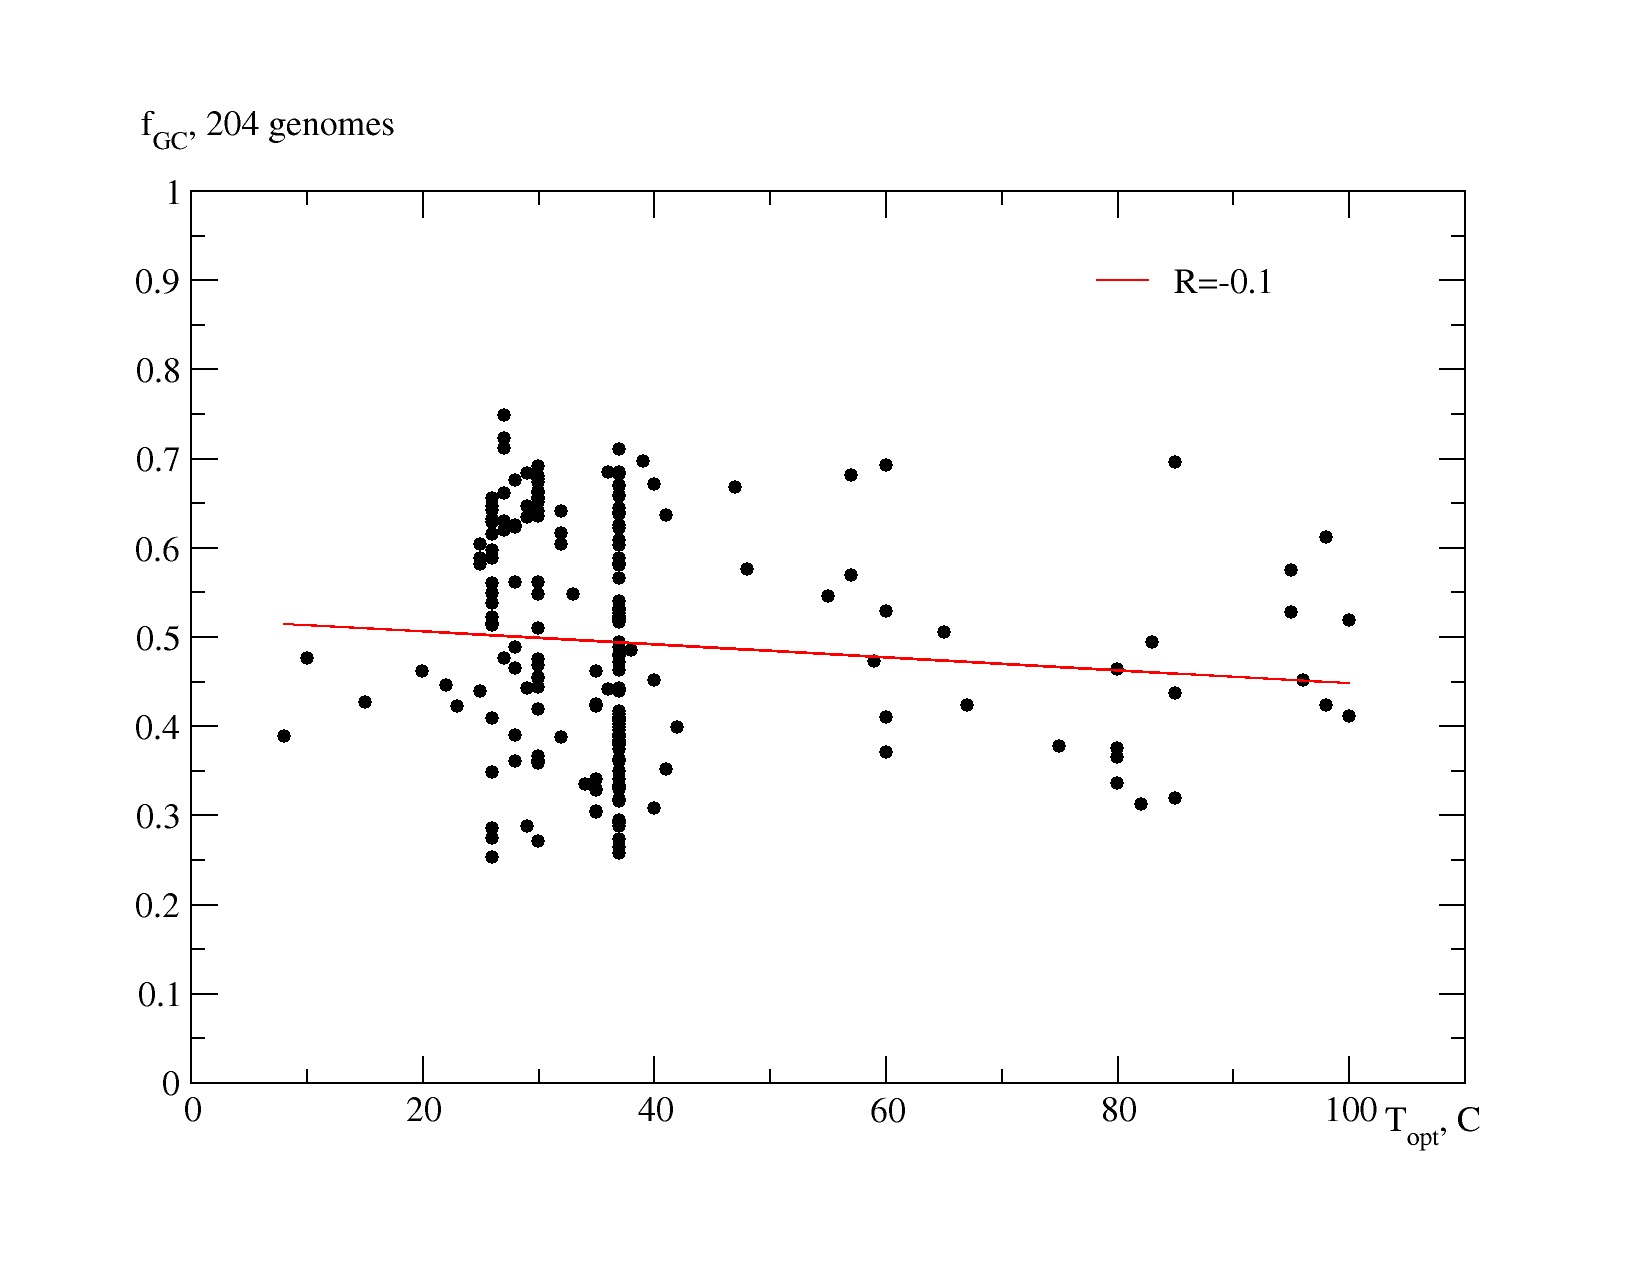

Supplement: S4 (10.1371/journal.pcbi.0030005.s004) [file journal.pcbi.0030005.s004]
